# Supplementary material
Source: MDPI journal article supplement (https://www.mdpi.com/2076-3271/12/1/14)
Supplement: s1 [file s1]

**Supplemental Table S1.** Distribution of HLA alleles in patients with chronic lymphoproliferative disorders and the control group. Comparison of the most important HLA alleles at the 4-digit level between patients and the control group.

| Allele      | Cases<br>n1=76 | Control<br>s n2=100 | P-value                        | OR    | 95% Confidence<br>interval |        |
|-------------|----------------|---------------------|--------------------------------|-------|----------------------------|--------|
|             | number         | number              | Chi-square<br>or Fisher's test |       | Low                        | Upper  |
| HLA-A*01:01 | 9              | 14                  | 0.674                          | 1.182 | 0.541                      | 2.585  |
| HLA-A*02:01 | 21             | 24                  | 0.584                          | 0.869 | 0.525                      | 1.438  |
| HLA-A*02:02 | 0              | 2                   | 0.506                          | 0.980 | 0.953                      | 1.008  |
| HLA-A*02:05 | 1              | 0                   | 0.432                          | 1.013 | 0.987                      | 1.040  |
| HLA-A*02:17 | 1              | 0                   | 0.432                          | 1.013 | 0.987                      | 1.040  |
| HLA-A*03:01 | 4              | 12                  | 0.185                          | 2.280 | 0.765                      | 6.792  |
| HLA-A*03:02 | 1              | 0                   | 0.432                          | 1.013 | 0.987                      | 1.040  |
| HLA-A*11:01 | 9              | 2                   | 0.010                          | 0.169 | 0.038                      | 0.759  |
| HLA-A*23:01 | 1              | 0                   | 0.432                          | 1.013 | 0.987                      | 1.040  |
| HLA-A*24:02 | 11             | 6                   | 0.059                          | 0.415 | 0.160                      | 1.071  |
| HLA-A*24:03 | 1              | 0                   | 0.432                          | 1.013 | 0.987                      | 1.040  |
| HLA-A*25:01 | 2              | 4                   | 0.700                          | 1.520 | 0.286                      | 8.082  |
| HLA-A*26:01 | 4              | 3                   | 0.467                          | 0.570 | 0.131                      | 2.471  |
| HLA-A*29:01 | 0              | 1                   | 1.000                          | 0.990 | 0.971                      | 1.010  |
| HLA-A*29:02 | 0              | 4                   | 0.135                          | 0.960 | 0.922                      | .999   |
| HLA-A*30:01 | 2              | 4                   | 0.700                          | 1.520 | 0.286                      | 8.082  |
| HLA-A*30:02 | 0              | 1                   | 1.000                          | 0.990 | 0.971                      | 1.010  |
| HLA-A*30:04 | 0              | 1                   | 1.000                          | 0.990 | 0.971                      | 1.010  |
| HLA-A*31:01 | 3              | 5                   | 1.000                          | 1.267 | 0.312                      | 5.136  |
| HLA-A*32:01 | 2              | 1                   | 0.579                          | 0.380 | 0.035                      | 4.113  |
| HLA-A*33:01 | 1              | 2                   | 1.000                          | 1.520 | 0.140                      | 16.454 |
| HLA-A*33:03 | 1              | 0                   | 0.432                          | 1.013 | 0.987                      | 1.040  |
| HLA-A*66:01 | 1              | 1                   | 1.000                          | 0.760 | 0.048                      | 11.957 |
| HLA-A*66:01 | 0              | 2                   | 0.506                          | 0.980 | 0.953                      | 1.008  |

|             |    |   |       |       |       |        |
|-------------|----|---|-------|-------|-------|--------|
| HLA-A*68:01 | 1  | 0 | 0.432 | 1.013 | 0.987 | 1.040  |
| HLA-A*68:02 | 0  | 5 | 0.071 | 0.950 | 0.908 | 0.994  |
| HLA-B*07:02 | 10 | 5 | 0.055 | 0.380 | 0.135 | 1.066  |
| HLA-B*08:01 | 3  | 8 | 0.354 | 2.027 | 0.556 | 7.384  |
| HLA-B*13:02 | 7  | 4 | 0.211 | 0.434 | 0.132 | 1.430  |
| HLA-B*14:01 | 0  | 1 | 1.000 | 0.990 | 0.971 | 1.010  |
| HLA-B*14:02 | 3  | 1 | 0.317 | 0.253 | 0.027 | 2.388  |
| HLA-B*15:01 | 1  | 1 | 1.000 | 0.760 | 0.048 | 11.957 |
| HLA-B*15:10 | 0  | 1 | 1.000 | 0.990 | 0.971 | 1.010  |
| HLA-B*18:01 | 3  | 8 | 0.354 | 2.027 | 0.556 | 7.384  |
| HLA-B*18:03 | 0  | 1 | 1.000 | 0.990 | 0.971 | 1.010  |
| HLA-B*18:04 | 0  | 1 | 1.000 | 0.990 | 0.971 | 1.010  |
| HLA-B*18:05 | 0  | 2 | 0.506 | 0.980 | 0.953 | 1.008  |
| HLA-B*27:02 | 0  | 1 | 1.000 | 0.990 | 0.971 | 1.010  |
| HLA-B*27:05 | 1  | 2 | 1.000 | 1.520 | 0.140 | 16.454 |
| HLA-B*35:01 | 6  | 3 | 0.177 | 0.380 | 0.098 | 1.471  |
| HLA-B*35:02 | 0  | 6 | 0.037 | 0.940 | 0.895 | 0.988  |
| HLA-B*35:03 | 6  | 3 | 0.177 | 0.380 | 0.098 | 1.471  |
| HLA-B*35:08 | 2  | 0 | 1.027 | .990  | 1.066 | 1.027  |
| HLA-B*37:01 | 0  | 1 | 1.000 | 0.990 | 0.971 | 1.010  |
| HLA-B*38:01 | 3  | 1 | 0.315 | 0.250 | 0.027 | 2.356  |
| HLA-B*39:01 | 4  | 1 | 0.167 | 0.190 | 0.022 | 1.666  |
| HLA-B*39:06 | 1  | 0 | 0.432 | 1.013 | 0.987 | 1.040  |
| HLA-B*40:02 | 1  | 4 | 0.391 | 3.040 | 0.347 | 26.650 |
| HLA-B*40:06 | 0  | 1 | 1.000 | 0.990 | 0.971 | 1.010  |
| HLA-B*41:01 | 1  | 3 | 0.635 | 2.280 | 0.242 | 21.490 |
| HLA-B*41:02 | 1  | 2 | 1.000 | 1.520 | 0.140 | 16.454 |
| HLA-B*44:02 | 0  | 4 | 0.135 | 0.960 | 0.922 | .999   |
| HLA-B*44:03 | 2  | 6 | 0.469 | 2.280 | 0.473 | 10.984 |
| HLA-B*49:01 | 0  | 3 | 0.260 | 0.970 | 0.937 | 1.004  |
| HLA-B*50:01 | 2  | 0 | 0.185 | 1.027 | 0.990 | 1.066  |

|             |    |    |       |       |       |        |
|-------------|----|----|-------|-------|-------|--------|
| HLA-B*51:01 | 6  | 8  | 0.980 | 1.013 | 0.367 | 2.798  |
| HLA-B*52:01 | 4  | 4  | 0.728 | 0.760 | 0.196 | 2.942  |
| HLA-B*55:01 | 1  | 4  | 0.391 | 3.040 | 0.347 | 26.650 |
| HLA-B*56:01 | 1  | 0  | 0.432 | 1.013 | 0.987 | 1.040  |
| HLA-B*57:01 | 2  | 1  | 0.579 | 0.380 | 0.035 | 4.113  |
| HLA-B*58:01 | 3  | 1  | 0.317 | 0.253 | 0.027 | 2.388  |
| HLA-B*58:02 | 0  | 1  | 1.000 | 0.990 | 0.971 | 1.010  |
| HLA-B*59:01 | 0  | 1  | 1.000 | 0.990 | 0.971 | 1.010  |
| HLA-B*81:01 | 0  | 6  | 0.037 | 0.940 | 0.895 | 0.988  |
| HLA-C*01:02 | 4  | 7  | 0.759 | 1.330 | 0.404 | 4.379  |
| HLA-C*02:02 | 7  | 0  | 0.002 | 1.101 | 1.025 | 1.183  |
| HLA-C*03:03 | 1  | 2  | 1.000 | 1.520 | 0.140 | 16.454 |
| HLA-C*03:04 | 1  | 1  | 1.000 | 0.760 | 0.048 | 11.957 |
| HLA-C*04:01 | 10 | 18 | 0.414 | 1.368 | 0.670 | 2.791  |
| HLA-C*05:01 | 0  | 2  | 0.506 | 0.980 | 0.953 | 1.008  |
| HLA-C*06:02 | 9  | 7  | 0.268 | 0.591 | 0.231 | 1.516  |
| HLA-C*07:01 | 7  | 15 | 0.358 | 1.629 | 0.699 | 3.796  |
| HLA-C*07:02 | 11 | 5  | 0.036 | 0.345 | 0.125 | 0.952  |
| HLA-C*07:04 | 0  | 1  | 1.000 | 0.990 | 0.971 | 1.010  |
| HLA-C*08:02 | 4  | 2  | 0.405 | 0.380 | 0.071 | 2.021  |
| HLA-C*12:02 | 7  | 0  | 0.002 | 1.101 | 1.025 | 1.183  |
| HLA-C*12:03 | 7  | 8  | 0.791 | 0.869 | 0.329 | 2.290  |
| HLA-C*12:12 | 0  | 1  | 1.000 | 0.990 | 0.971 | 1.010  |
| HLA-C*14:02 | 1  | 0  | 0.432 | 1.013 | 0.987 | 1.040  |
| HLA-C*15:02 | 4  | 2  | 0.405 | 0.380 | 0.071 | 2.021  |
| HLA-C*15:04 | 1  | 0  | 0.432 | 1.013 | 0.987 | 1.040  |
| HLA-C*15:05 | 1  | 0  | 0.432 | 1.013 | 0.987 | 1.040  |
| HLA-C*15:13 | 0  | 2  | 0.506 | 0.980 | 0.953 | 1.008  |
| HLA-C*16:01 | 0  | 4  | 0.135 | 0.960 | 0.922 | 0.999  |
| HLA-C*16:02 | 0  | 1  | 1.000 | 0.990 | 0.971 | 1.010  |
| HLA-C*16:04 | 0  | 1  | 1.000 | 0.990 | 0.971 | 1.010  |

|                 |    |    |       |       |       |        |
|-----------------|----|----|-------|-------|-------|--------|
| HLA-C*17:01     | 0  | 2  | 0.506 | 0.980 | 0.953 | 1.008  |
| HLA-C*17:03     | 1  | 3  | 0.635 | 2.280 | 0.242 | 21.490 |
| HLA-C*18:01     | 0  | 1  | 1.000 | 0.990 | 0.971 | 1.010  |
| HLA-DPB1*01:01  | 1  | 9  | 0.045 | 6.840 | 0.886 | 52.833 |
| HLA-DPB1*02:01  | 4  | 14 | 0.078 | 2.660 | 0.912 | 7.758  |
| HLA-DPB1*02:02  | 0  | 1  | 1.000 | 0.990 | 0.971 | 1.010  |
| HLA-DPB1*03:01  | 6  | 10 | 0.793 | 1.267 | 0.482 | 3.332  |
| HLA-DPB1*04:01  | 19 | 31 | 0.404 | 1.240 | 0.762 | 2.018  |
| HLA-DPB1*04:02  | 12 | 15 | 1.000 | 0.950 | 0.473 | 1.909  |
| HLA-DPB1*05:01  | 0  | 4  | 0.135 | 0.960 | 0.922 | 0.999  |
| HLA-DPB1*09:01  | 2  | 2  | 1.000 | 0.760 | 0.110 | 5.274  |
| HLA-DPB1*10:01  | 0  | 3  | 0.260 | 0.970 | 0.937 | 1.004  |
| HLA-DPB1*13:01  | 2  | 1  | 0.579 | 0.380 | 0.035 | 4.113  |
| HLA-DPB1*14:01  | 0  | 1  | 1.000 | 0.990 | 0.971 | 1.010  |
| HLA-DPB1*17:01  | 0  | 3  | 0.260 | 0.970 | 0.937 | 1.004  |
| HLA-DPB1*18:01  | 0  | 1  | 1.000 | 0.990 | 0.971 | 1.010  |
| HLA-DPB1*23:01  | 0  | 1  | 1.000 | 0.990 | 0.971 | 1.010  |
| HLA-DPB1*104:01 | 0  | 3  | 0.260 | 0.970 | 0.937 | 1.004  |
| HLA-DPB1*105:01 | 0  | 1  | 1.000 | 0.990 | 0.971 | 1.010  |
| HLA-DQB1*02:01  | 7  | 12 | 0.555 | 1.303 | 0.539 | 3.151  |
| HLA-DQB1*02:02  | 7  | 10 | 1.000 | 1.086 | 0.433 | 2.721  |
| HLA-DQB1*03:01  | 18 | 21 | 0.716 | 0.887 | 0.509 | 1.544  |
| HLA-DQB1*03:02  | 5  | 3  | 0.294 | 0.456 | 0.112 | 1.849  |
| HLA-DQB1*03:03  | 1  | 0  | 0.432 | 1.013 | 0.987 | 1.040  |
| HLA-DQB1*03:19  | 0  | 1  | 1.000 | 0.990 | 0.971 | 1.010  |
| HLA-DQB1*04:02  | 2  | 3  | 1.000 | 1.140 | 0.195 | 6.654  |
| HLA-DQB1*05:01  | 7  | 9  | 0.962 | 0.977 | 0.381 | 2.506  |
| HLA-DQB1*05:02  | 12 | 14 | 0.740 | 0.887 | 0.435 | 1.805  |
| HLA-DQB1*05:03  | 1  | 5  | 0.237 | 3.800 | 0.453 | 31.856 |
| HLA-DQB1*05:04  | 0  | 1  | 1.000 | 0.990 | 0.971 | 1.010  |

|                |   |    |       |       |        |        |
|----------------|---|----|-------|-------|--------|--------|
| HLA-DQB1*06:01 | 4 | 2  | 0.405 | 0.380 | 0.071  | 2.021  |
| HLA-DQB1*06:02 | 6 | 7  | 0.822 | 0.887 | 0.311  | 2.531  |
| HLA-DQB1*06:03 | 5 | 5  | 0.654 | 0.760 | 0.228  | 2.531  |
| HLA-DQB1*06:04 | 1 | 3  | 2.280 | 0.242 | 21.490 | 2.280  |
| HLA-DQB1*06:09 | 0 | 1  | 1.000 | 0.990 | 0.971  | 1.010  |
| HLA-DRB1*01:01 | 4 | 7  | 0.759 | 1.330 | 0.404  | 4.379  |
| HLA-DRB1*01:02 | 1 | 0  | 0.432 | 1.013 | 0.987  | 1.040  |
| HLA-DRB1*03:01 | 7 | 13 | 0.481 | 1.411 | 0.592  | 3.366  |
| HLA-DRB1*03:02 | 0 | 1  | 1.000 | 0.990 | 0.971  | 1.010  |
| HLA-DRB1*04:01 | 1 | 3  | 2.280 | 0.242 | 21.490 | 2.280  |
| HLA-DRB1*04:02 | 1 | 0  | 0.432 | 1.013 | 0.987  | 1.040  |
| HLA-DRB1*04:04 | 3 | 0  | 0.079 | 1.041 | 0.995  | 1.090  |
| HLA-DRB1*04:05 | 0 | 1  | 1.000 | 0.990 | 0.971  | 1.010  |
| HLA-DRB1*04:07 | 1 | 0  | 0.432 | 1.013 | 0.987  | 1.040  |
| HLA-DRB1*07:01 | 8 | 13 | 1.235 | 0.539 | 2.829  | 1.235  |
| HLA-DRB1*08:01 | 1 | 2  | 1.000 | 1.520 | 0.140  | 16.454 |
| HLA-DRB1*10:01 | 0 | 2  | 0.506 | 0.980 | 0.953  | 1.008  |
| HLA-DRB1*11:01 | 8 | 2  | 0.021 | 0.190 | 0.042  | .869   |
| HLA-DRB1*11:02 | 0 | 2  | 0.506 | 0.980 | 0.953  | 1.008  |
| HLA-DRB1*11:03 | 1 | 1  | 1.000 | 0.760 | 0.048  | 11.957 |
| HLA-DRB1*11:04 | 7 | 11 | 0.804 | 1.194 | 0.486  | 2.936  |
| HLA-DRB1*12:01 | 1 | 2  | 1.000 | 1.520 | 0.140  | 16.454 |
| HLA-DRB1*13:01 | 6 | 5  | 0.534 | 0.633 | 0.201  | 1.998  |
| HLA-DRB1*13:02 | 0 | 6  | 0.037 | 0.940 | 0.895  | 0.988  |
| HLA-DRB1*13:03 | 2 | 3  | 1.000 | 1.140 | 0.195  | 6.654  |
| HLA-DRB1*13:05 | 0 | 1  | 1.000 | 0.990 | 0.971  | 1.010  |
| HLA-DRB1*14:01 | 0 | 1  | 1.000 | 0.990 | 0.971  | 1.010  |
| HLA-DRB1*14:04 | 0 | 1  | 1.000 | 0.990 | 0.971  | 1.010  |
| HLA-DRB1*14:54 | 1 | 4  | 0.391 | 3.040 | 0.347  | 26.650 |
| HLA-DRB1*15:01 | 6 | 7  | 0.822 | 0.887 | 0.311  | 2.531  |
| HLA-DRB1*15:02 | 4 | 3  | 0.467 | 0.570 | 0.131  | 2.471  |

|                       |    |   |       |       |       |       |
|-----------------------|----|---|-------|-------|-------|-------|
| <b>HLA-DRB1*16:01</b> | 11 | 7 | 0.105 | 0.484 | 0.197 | 1.189 |
| <b>HLA-DRB1*16:02</b> | 2  | 1 | 0.579 | 0.380 | 0.035 | 4.113 |

\* Statistical significance was determined after calculating the  $p$ -value, OR (odds ratio), and CI (confidence interval). The chi-square test or Fisher's test was used to estimate the differences between the patient and control groups;  $n$ : number of alleles in the patient and control groups
