# Supplementary material
Source: MDPI journal article supplement (https://www.mdpi.com/2076-3271/12/1/14)
Supplement: s1 [file s1]

**Supplemental Table S2.** Distribution of HLA alleles in patients with Peripheral T-cell lymphoma not otherwise specified (PTCL-NOS) and the control group. Comparison of the most important HLA alleles at the 4-digit level between patients and the control group.

| Allele      | Cases<br>n1=32 | Controls<br>n2=100 | P-value                        | OR    | 95%<br>interval | Confidence |
|-------------|----------------|--------------------|--------------------------------|-------|-----------------|------------|
|             | number         | number             | Chi-square<br>or Fisher's test |       | Low             | Upper      |
| HLA-A*01:01 | 6              | 14                 | .514                           | .747  | .313            | 1.781      |
| HLA-A*02:01 | 7              | 24                 | .805                           | 1.097 | .522            | 2.304      |
| HLA-A*02:02 | 0              | 2                  | 1.000                          | .980  | .953            | 1.008      |
| HLA-A*03:01 | 2              | 12                 | .516                           | 1.920 | .454            | 8.128      |
| HLA-A*11:01 | 5              | 2                  | .009                           | .128  | .026            | .628       |
| HLA-A*23:01 | 1              | 0                  | .242                           | 1.032 | .970            | 1.099      |
| HLA-A*24:02 | 4              | 6                  | .255                           | .480  | .144            | 1.595      |
| HLA-A*25:01 | 0              | 4                  | .572                           | .960  | .922            | .999       |
| HLA-A*26:01 | 1              | 3                  | 1.000                          | .960  | .103            | 8.909      |
| HLA-A*29:01 | 0              | 1                  | 1.000                          | .990  | .971            | 1.010      |
| HLA-A*29:02 | 0              | 4                  | .572                           | .960  | .922            | .999       |
| HLA-A*30:01 | 1              | 4                  | 1.000                          | 1.280 | .148            | 11.042     |
| HLA-A*30:02 | 0              | 1                  | 1.000                          | .990  | .971            | 1.010      |
| HLA-A*30:04 | 0              | 1                  | 1.000                          | .990  | .971            | 1.010      |
| HLA-A*31:01 | 1              | 5                  | 1.000                          | 1.600 | .194            | 13.195     |
| HLA-A*32:01 | 0              | 1                  | 1.000                          | .990  | .971            | 1.010      |
| HLA-A*33:01 | 1              | 2                  | .568                           | .640  | .060            | 6.827      |
| HLA-A*33:03 | 1              | 0                  | .242                           | 1.032 | .970            | 1.099      |
| HLA-A*66:01 | 1              | 1                  | .427                           | .320  | .021            | 4.971      |
| HLA-A*66:02 | 0              | 2                  | 1.000                          | .980  | .953            | 1.008      |
| HLA-A*68:01 | 1              | 0                  | .242                           | 1.032 | .970            | 1.099      |
| HLA-A*68:02 | 0              | 5                  | 0.335                          | .950  | .908            | .994       |

|             |   |   |       |       |       |        |
|-------------|---|---|-------|-------|-------|--------|
| HLA-B*07:02 | 2 | 5 | .676  | .800  | .163  | 3.926  |
| HLA-B*08:01 | 2 | 8 | 1.000 | 1.280 | .286  | 5.722  |
| HLA-B*13:02 | 4 | 4 | .097  | 1.097 | .957  | 1.258  |
| HLA-B*14:01 | 0 | 1 | 1.000 | .990  | .971  | 1.010  |
| HLA-B*14:02 | 2 | 1 | .146  | .160  | .015  | 1.707  |
| HLA-B*15:01 | 0 | 1 | 1.000 | .990  | .971  | 1.010  |
| HLA-B*15:10 | 0 | 1 | 1.000 | .990  | .971  | 1.010  |
| HLA-B*18:01 | 2 | 8 | 1.000 | 1.280 | .286  | 5.722  |
| HLA-B*18:03 | 0 | 1 | 1.000 | .990  | .971  | 1.010  |
| HLA-B*18:04 | 0 | 1 | 1.000 | .990  | .971  | 1.010  |
| HLA-B*18:05 | 0 | 2 | 1.000 | .980  | .953  | 1.008  |
| HLA-B*27:02 | 0 | 1 | 1.000 | .990  | .971  | 1.010  |
| HLA-B*27:05 | 0 | 2 | 1.000 | .980  | .953  | 1.008  |
| HLA-B*35:01 | 3 | 3 | .153  | .320  | .068  | 1.508  |
| HLA-B*35:02 | 0 | 6 | .335  | .940  | .895  | .988   |
| HLA-B*35:03 | 3 | 3 | .153  | .320  | .068  | 1.508  |
| HLA-B*35:08 | 2 | 0 | 1.067 | .975  | 1.166 | 1.067  |
| HLA-B*37:01 | 0 | 1 | 1.000 | .990  | .971  | 1.010  |
| HLA-B*38:01 | 0 | 1 | 1.000 | .990  | .971  | 1.010  |
| HLA-B*39:01 | 0 | 1 | 1.000 | .990  | .971  | 1.010  |
| HLA-B*39:06 | 1 | 0 | .242  | 1.032 | .970  | 1.099  |
| HLA-B*40:02 | 0 | 4 | .572  | .960  | .922  | .999   |
| HLA-B*40:06 | 0 | 1 | 1.000 | .990  | .971  | 1.010  |
| HLA-B*41:01 | 0 | 3 | 1.000 | .970  | .937  | 1.004  |
| HLA-B*41:02 | 1 | 2 | .568  | .640  | .060  | 6.827  |
| HLA-B*44:02 | 0 | 4 | .572  | .960  | .922  | .999   |
| HLA-B*44:03 | 1 | 6 | 1.000 | 1.920 | .240  | 15.357 |
| HLA-B*49:01 | 0 | 3 | 1.000 | .970  | .937  | 1.004  |
| HLA-B*51:01 | 0 | 8 | .198  | .920  | .868  | .975   |

|             |   |    |       |       |       |        |
|-------------|---|----|-------|-------|-------|--------|
| HLA-B*52:01 | 3 | 4  | .359  | .427  | .101  | 1.806  |
| HLA-B*55:01 | 1 | 4  | 1.000 | 1.280 | .148  | 11.042 |
| HLA-B*56:01 | 1 | 0  | .242  | 1.032 | .970  | 1.099  |
| HLA-B*57:01 | 0 | 1  | 1.000 | .990  | .971  | 1.010  |
| HLA-B*58:01 | 2 | 1  | .146  | .160  | .015  | 1.707  |
| HLA-B*58:02 | 0 | 1  | 1.000 | .990  | .971  | 1.010  |
| HLA-B*59:01 | 0 | 1  | 1.000 | .990  | .971  | 1.010  |
| HLA-B*81:01 | 0 | 6  | .335  | .940  | .895  | .988   |
| HLA-C*01:02 | 3 | 7  | .704  | .747  | .205  | 2.720  |
| HLA-C*02:02 | 1 | 0  | .242  | 1.032 | .970  | 1.099  |
| HLA-C*03:03 | 0 | 2  | 1.000 | .980  | .953  | 1.008  |
| HLA-C*03:04 | 1 | 1  | .427  | .320  | .021  | 4.971  |
| HLA-C*04:01 | 6 | 18 | .924  | .960  | .417  | 2.210  |
| HLA-C*05:01 | 0 | 2  | 1.000 | .980  | .953  | 1.008  |
| HLA-C*06:02 | 4 | 7  | .461  | .560  | .175  | 1.790  |
| HLA-C*07:01 | 3 | 15 | .560  | 1.600 | .495  | 5.176  |
| HLA-C*07:02 | 3 | 5  | .401  | .533  | .135  | 2.109  |
| HLA-C*07:04 | 0 | 1  | 1.000 | .990  | .971  | 1.010  |
| HLA-C*08:02 | 2 | 2  | .247  | .320  | .047  | 2.181  |
| HLA-C*12:02 | 6 | 0  | .0001 | 1.231 | 1.042 | 1.454  |
| HLA-C*12:03 | 1 | 8  | .687  | 2.560 | .333  | 19.696 |
| HLA-C*12:12 | 0 | 1  | 1.000 | .990  | .971  | 1.010  |
| HLA-C*15:02 | 1 | 2  | .568  | .640  | .060  | 6.827  |
| HLA-C*15:13 | 0 | 2  | 1.000 | .980  | .953  | 1.008  |
| HLA-C*16:01 | 0 | 4  | .572  | .960  | .922  | .999   |
| HLA-C*16:02 | 0 | 1  | 1.000 | .990  | .971  | 1.010  |
| HLA-C*16:04 | 0 | 1  | 1.000 | .990  | .971  | 1.010  |
| HLA-C*17:01 | 0 | 2  | 1.000 | .980  | .953  | 1.008  |
| HLA-C*17:03 | 1 | 3  | 1.000 | .960  | .103  | 8.909  |

|                 |   |    |       |       |      |        |
|-----------------|---|----|-------|-------|------|--------|
| HLA-C*18:01     | 0 | 1  | 1.000 | .990  | .971 | 1.010  |
| HLA-DPB1*01:01  | 0 | 9  | .133  | .910  | .856 | .968   |
| HLA-DPB1*02:01  | 2 | 14 | .355  | 2.240 | .538 | 9.333  |
| HLA-DPB1*02:02  | 0 | 1  | 1.000 | .990  | .971 | 1.010  |
| HLA-DPB1*03:01  | 5 | 10 | .358  | .640  | .236 | 1.734  |
| HLA-DPB1*04:01  | 7 | 31 | .376  | 1.417 | .692 | 2.903  |
| HLA-DPB1*04:02  | 5 | 15 | .932  | .960  | .379 | 2.434  |
| HLA-DPB1*05:01  | 0 | 4  | .572  | .960  | .922 | .999   |
| HLA-DPB1*09:01  | 1 | 2  | .568  | .640  | .060 | 6.827  |
| HLA-DPB1*10:01  | 0 | 3  | 1.000 | .970  | .937 | 1.004  |
| HLA-DPB1*13:01  | 0 | 1  | 1.000 | .990  | .971 | 1.010  |
| HLA-DPB1*14:01  | 0 | 1  | 1.000 | .990  | .971 | 1.010  |
| HLA-DPB1*17:01  | 0 | 3  | 1.000 | .970  | .937 | 1.004  |
| HLA-DPB1*18:01  | 0 | 1  | 1.000 | .990  | .971 | 1.010  |
| HLA-DPB1*23:01  | 0 | 1  | 1.000 | .990  | .971 | 1.010  |
| HLA-DPB1*104:01 | 0 | 3  | 1.000 | .970  | .937 | 1.004  |
| HLA-DPB1*105:01 | 0 | 1  | 1.000 | .990  | .971 | 1.010  |
| HLA-DQB1*02:01  | 3 | 12 | 1.000 | 1.280 | .385 | 4.254  |
| HLA-DQB1*02:02  | 5 | 10 | .358  | 1.667 | .524 | 5.298  |
| HLA-DQB1*03:01  | 8 | 21 | .630  | .840  | .413 | 1.709  |
| HLA-DQB1*03:02  | 1 | 3  | 1.000 | .960  | .103 | 8.909  |
| HLA-DQB1*03:19  | 0 | 1  | 1.000 | .990  | .971 | 1.010  |
| HLA-DQB1*04:02  | 0 | 3  | 1.000 | .970  | .937 | 1.004  |
| HLA-DQB1*05:01  | 3 | 9  | 1.000 | .960  | .277 | 3.332  |
| HLA-DQB1*05:02  | 5 | 14 | .779  | .896  | .350 | 2.295  |
| HLA-DQB1*05:03  | 1 | 5  | 1.000 | 1.600 | .194 | 13.195 |
| HLA-DQB1*05:04  | 0 | 1  | 1.000 | .990  | .971 | 1.010  |

|                |   |    |       |       |      |        |
|----------------|---|----|-------|-------|------|--------|
| HLA-DQB1*06:01 | 3 | 2  | .092  | .213  | .037 | 1.221  |
| HLA-DQB1*06:02 | 1 | 7  | .679  | 2.240 | .286 | 17.525 |
| HLA-DQB1*06:03 | 1 | 5  | 1.000 | 1.600 | .194 | 13.195 |
| HLA-DQB1*06:04 | 1 | 3  | 1.000 | .960  | .103 | 8.909  |
| HLA-DQB1*06:09 | 0 | 1  | 1.000 | .990  | .971 | 1.010  |
| HLA-DRB1*01:01 | 1 | 7  | .679  | 2.240 | .286 | 17.525 |
| HLA-DRB1*01:02 | 1 | 0  | .242  | 1.032 | .970 | 1.099  |
| HLA-DRB1*03:01 | 3 | 13 | .760  | 1.387 | .422 | 4.561  |
| HLA-DRB1*03:02 | 0 | 1  | 1.000 | .990  | .971 | 1.010  |
| HLA-DRB1*04:01 | 0 | 3  | 1.000 | .970  | .937 | 1.004  |
| HLA-DRB1*04:04 | 2 | 0  | .057  | 1.067 | .975 | 1.166  |
| HLA-DRB1*04:05 | 0 | 1  | 1.000 | .990  | .971 | 1.010  |
| HLA-DRB1*07:01 | 5 | 13 | .769  | .832  | .321 | 2.155  |
| HLA-DRB1*08:01 | 0 | 2  | 1.000 | .980  | .953 | 1.008  |
| HLA-DRB1*10:01 | 0 | 2  | 1.000 | .980  | .953 | 1.008  |
| HLA-DRB1*11:01 | 4 | 2  | .03   | .160  | .031 | .833   |
| HLA-DRB1*11:02 | 0 | 2  | 1.000 | .980  | .953 | 1.008  |
| HLA-DRB1*11:03 | 0 | 1  | 1.000 | .990  | .971 | 1.010  |
| HLA-DRB1*11:04 | 2 | 11 | .733  | 1.760 | .412 | 7.526  |
| HLA-DRB1*12:01 | 1 | 2  | .568  | .640  | .060 | 6.827  |
| HLA-DRB1*13:01 | 1 | 5  | 1.000 | 1.600 | .194 | 13.195 |
| HLA-DRB1*13:02 | 0 | 6  | .335  | .940  | .895 | .988   |
| HLA-DRB1*13:03 | 1 | 3  | 1.000 | .960  | .103 | 8.909  |
| HLA-DRB1*13:05 | 0 | 1  | 1.000 | .990  | .971 | 1.010  |
| HLA-DRB1*14:01 | 0 | 1  | 1.000 | .990  | .971 | 1.010  |
| HLA-DRB1*14:04 | 0 | 1  | 1.000 | .990  | .971 | 1.010  |
| HLA-DRB1*14:54 | 1 | 4  | 1.000 | 1.280 | .148 | 11.042 |
| HLA-DRB1*15:01 | 0 | 7  | .194  | .930  | .881 | .981   |
| HLA-DRB1*15:02 | 4 | 3  | .059  | .240  | .057 | 1.016  |

|                       |   |   |      |      |      |       |
|-----------------------|---|---|------|------|------|-------|
| <b>HLA-DRB1*16:01</b> | 5 | 7 | .162 | .448 | .153 | 1.314 |
| <b>HLA-DRB1*16:02</b> | 1 | 1 | .427 | .320 | .021 | 4.971 |

\* Statistical significance was determined after calculating the *p*-value, OR (odds ratio), and CI (confidence interval). The chi-square test or Fisher's test was used to estimate the differences between the patient and control groups; *n*: number of alleles in the patient and control groups.
