# Supplementary material
Source: MDPI journal article supplement (https://www.mdpi.com/2076-3271/12/1/14)
Supplement: s1 [file s1]

**Supplemental Table S3.** Distribution of HLA alleles in patients with Diffuse large B-cell lymphoma (DLBCL). and the control group. Comparison of the most important HLA alleles at the 4-digit level between patients and the control group.

| Allele      | Cases<br>n1=12 | Control<br>s n2=100 | P-value                        | OR    | 95% Confidence interval |        |
|-------------|----------------|---------------------|--------------------------------|-------|-------------------------|--------|
|             | number         | number              | Chi-square<br>or Fisher's test |       | Low                     | Upper  |
| HLA-A*01:01 | 1              | 14                  | 1.000                          | 1.680 | .242                    | 11.672 |
| HLA-A*02:01 | 3              | 24                  | 1.000                          | .960  | .339                    | 2.717  |
| HLA-A*02:02 | 0              | 2                   | 1.000                          | .980  | .953                    | 1.008  |
| HLA-A*02:05 | 1              | 0                   | .107                           | 1.091 | .920                    | 1.294  |
| HLA-A*03:01 | 1              | 12                  | 1.000                          | 1.440 | .205                    | 10.123 |
| HLA-A*11:01 | 0              | 2                   | 1.000                          | .980  | .953                    | 1.008  |
| HLA-A*24:02 | 3              | 6                   | .055                           | .240  | .069                    | .838   |
| HLA-A*25:01 | 1              | 4                   | .439                           | .480  | .058                    | 3.951  |
| HLA-A*26:01 | 1              | 3                   | .369                           | .360  | .041                    | 3.193  |
| HLA-A*29:01 | 0              | 1                   | 1.000                          | .990  | .971                    | 1.010  |
| HLA-A*29:02 | 0              | 4                   | 1.000                          | .960  | .922                    | .999   |
| HLA-A*30:01 | 0              | 4                   | 1.000                          | .960  | .922                    | .999   |
| HLA-A*30:02 | 0              | 1                   | 1.000                          | .990  | .971                    | 1.010  |
| HLA-A*30:04 | 0              | 1                   | 1.000                          | .990  | .971                    | 1.010  |
| HLA-A*31:01 | 0              | 5                   | 1.000                          | .950  | .908                    | .994   |
| HLA-A*32:01 | 1              | 1                   | .204                           | .120  | .008                    | 1.797  |
| HLA-A*33:01 | 0              | 2                   | 1.000                          | .980  | .953                    | 1.008  |
| HLA-A*66:01 | 0              | 1                   | 1.000                          | .990  | .971                    | 1.010  |
| HLA-A*66:02 | 0              | 2                   | 1.000                          | .980  | .953                    | 1.008  |
| HLA-A*68:02 | 0              | 5                   | 1.000                          | .950  | .908                    | .994   |
| HLA-B*07:02 | 2              | 5                   | .163                           | .300  | .065                    | 1.381  |
| HLA-B*08:01 | 0              | 8                   | .596                           | .920  | .868                    | .975   |

|             |   |   |       |      |      |       |
|-------------|---|---|-------|------|------|-------|
| HLA-B*13:02 | 0 | 4 | 1.000 | .960 | .922 | .999  |
| HLA-B*14:01 | 0 | 1 | 1.000 | .990 | .971 | 1.010 |
| HLA-B*14:02 | 0 | 1 | 1.000 | .990 | .971 | 1.010 |
| HLA-B*15:01 | 0 | 1 | 1.000 | .990 | .971 | 1.010 |
| HLA-B*15:10 | 0 | 1 | 1.000 | .990 | .971 | 1.010 |
| HLA-B*18:01 | 1 | 8 | 1.000 | .960 | .131 | 7.028 |
| HLA-B*18:03 | 0 | 1 | 1.000 | .990 | .971 | 1.010 |
| HLA-B*18:04 | 0 | 1 | 1.000 | .990 | .971 | 1.010 |
| HLA-B*18:05 | 0 | 2 | 1.000 | .980 | .953 | 1.008 |
| HLA-B*27:02 | 0 | 1 | 1.000 | .990 | .971 | 1.010 |
| HLA-B*27:05 | 0 | 2 | 1.000 | .980 | .953 | 1.008 |
| HLA-B*35:01 | 2 | 3 | .088  | .180 | .033 | .972  |
| HLA-B*35:02 | 0 | 6 | 1.000 | .940 | .895 | .988  |
| HLA-B*35:03 | 0 | 3 | 1.000 | .970 | .937 | 1.004 |
| HLA-B*37:01 | 0 | 1 | 1.000 | .990 | .971 | 1.010 |
| HLA-B*38:01 | 2 | 1 | .030  | .060 | .006 | .613  |
| HLA-B*39:01 | 2 | 1 | .030  | .060 | .006 | .613  |
| HLA-B*40:02 | 0 | 4 | 1.000 | .960 | .922 | .999  |
| HLA-B*40:06 | 0 | 1 | 1.000 | .990 | .971 | 1.010 |
| HLA-B*41:01 | 0 | 3 | 1.000 | .970 | .937 | 1.004 |
| HLA-B*41:02 | 0 | 2 | 1.000 | .980 | .953 | 1.008 |
| HLA-B*44:02 | 0 | 4 | 1.000 | .960 | .922 | .999  |
| HLA-B*44:03 | 0 | 6 | 1.000 | .940 | .895 | .988  |
| HLA-B*49:01 | 0 | 3 | 1.000 | .970 | .937 | 1.004 |
| HLA-B*51:01 | 2 | 8 | .291  | .480 | .115 | 2.004 |
| HLA-B*52:01 | 0 | 4 | 1.000 | .960 | .922 | .999  |
| HLA-B*55:01 | 0 | 4 | 1.000 | .960 | .922 | .999  |
| HLA-B*57:01 | 1 | 1 | .204  | .120 | .008 | 1.797 |
| HLA-B*58:01 | 0 | 1 | 1.000 | .990 | .971 | 1.010 |

|                |   |    |       |       |      |       |
|----------------|---|----|-------|-------|------|-------|
| HLA-B*58:02    | 0 | 1  | 1.000 | .990  | .971 | 1.010 |
| HLA-B*59:01    | 0 | 1  | 1.000 | .990  | .971 | 1.010 |
| HLA-B*81:01    | 0 | 6  | 1.000 | .940  | .895 | .988  |
| HLA-C*01:02    | 1 | 7  | 1.000 | .840  | .113 | 6.256 |
| HLA-C*02:02    | 1 | 0  | .107  | 1.091 | .920 | 1.294 |
| HLA-C*03:03    | 0 | 2  | 1.000 | .980  | .953 | 1.008 |
| HLA-C*03:04    | 0 | 1  | 1.000 | .990  | .971 | 1.010 |
| HLA-C*04:01    | 2 | 18 | 1.000 | 1.080 | .285 | 4.094 |
| HLA-C*05:01    | 0 | 2  | 1.000 | .980  | .953 | 1.008 |
| HLA-C*06:02    | 1 | 7  | 1.000 | .840  | .113 | 6.256 |
| HLA-C*07:01    | 2 | 15 | 1.000 | .900  | .234 | 3.466 |
| HLA-C*07:02    | 1 | 5  | .502  | .600  | .076 | 4.716 |
| HLA-C*07:04    | 0 | 1  | 1.000 | .990  | .971 | 1.010 |
| HLA-C*08:02    | 1 | 2  | .291  | .240  | .023 | 2.453 |
| HLA-C*12:03    | 3 | 8  | .095  | .320  | .098 | 1.046 |
| HLA-C*12:12    | 0 | 1  | 1.000 | .990  | .971 | 1.010 |
| HLA-C*15:02    | 0 | 2  | 1.000 | .980  | .953 | 1.008 |
| HLA-C*15:13    | 0 | 2  | 1.000 | .980  | .953 | 1.008 |
| HLA-C*16:01    | 0 | 4  | 1.000 | .960  | .922 | .999  |
| HLA-C*16:02    | 0 | 1  | 1.000 | .990  | .971 | 1.010 |
| HLA-C*16:04    | 0 | 1  | 1.000 | .990  | .971 | 1.010 |
| HLA-C*17:01    | 0 | 2  | 1.000 | .980  | .953 | 1.008 |
| HLA-C*17:03    | 0 | 3  | 1.000 | .970  | .937 | 1.004 |
| HLA-C*18:01    | 0 | 1  | 1.000 | .990  | .971 | 1.010 |
| HLA-DPB1*01:01 | 0 | 9  | .594  | .910  | .856 | .968  |
| HLA-DPB1*02:01 | 1 | 14 | 1.000 | .938  | .777 | 1.132 |
| HLA-DPB1*02:02 | 0 | 1  | 1.000 | .990  | .971 | 1.010 |
| HLA-DPB1*03:01 | 0 | 10 | .597  | .900  | .843 | .961  |
| HLA-DPB1*04:01 | 3 | 31 | 1.000 | 1.240 | .446 | 3.448 |

|                 |   |    |       |       |      |       |
|-----------------|---|----|-------|-------|------|-------|
| HLA-DPB1*04:02  | 4 | 15 | .120  | .450  | .178 | 1.136 |
| HLA-DPB1*05:01  | 0 | 4  | 1.000 | .960  | .922 | .999  |
| HLA-DPB1*09:01  | 0 | 2  | 1.000 | .980  | .953 | 1.008 |
| HLA-DPB1*10:01  | 0 | 3  | 1.000 | .970  | .937 | 1.004 |
| HLA-DPB1*13:01  | 0 | 1  | 1.000 | .990  | .971 | 1.010 |
| HLA-DPB1*14:01  | 0 | 1  | 1.000 | .990  | .971 | 1.010 |
| HLA-DPB1*17:01  | 0 | 3  | 1.000 | .970  | .937 | 1.004 |
| HLA-DPB1*18:01  | 0 | 1  | 1.000 | .990  | .971 | 1.010 |
| HLA-DPB1*23:01  | 0 | 1  | 1.000 | .990  | .971 | 1.010 |
| HLA-DPB1*104:01 | 0 | 3  | 1.000 | .970  | .937 | 1.004 |
| HLA-DPB1*105:01 | 0 | 1  | 1.000 | .990  | .971 | 1.010 |
| HLA-DQB1*02:01  | 0 | 12 | .357  | .880  | .819 | .946  |
| HLA-DQB1*02:02  | 0 | 10 | .597  | .900  | .843 | .961  |
| HLA-DQB1*03:01  | 4 | 21 | .461  | .630  | .260 | 1.528 |
| HLA-DQB1*03:02  | 2 | 3  | .088  | .180  | .033 | .972  |
| HLA-DQB1*03:19  | 0 | 1  | 1.000 | .990  | .971 | 1.010 |
| HLA-DQB1*04:02  | 1 | 3  | .369  | .360  | .041 | 3.193 |
| HLA-DQB1*05:01  | 1 | 9  | 1.000 | 1.080 | .150 | 7.801 |
| HLA-DQB1*05:02  | 2 | 14 | .681  | .840  | .217 | 3.257 |
| HLA-DQB1*05:03  | 0 | 5  | 1.000 | .950  | .908 | .994  |
| HLA-DQB1*05:04  | 0 | 1  | 1.000 | .990  | .971 | 1.010 |
| HLA-DQB1*06:01  | 1 | 2  | .291  | .240  | .023 | 2.453 |
| HLA-DQB1*06:02  | 0 | 7  | 1.000 | .930  | .881 | .981  |
| HLA-DQB1*06:03  | 1 | 5  | .502  | .600  | .076 | 4.716 |
| HLA-DQB1*06:04  | 0 | 3  | 1.000 | .970  | .937 | 1.004 |
| HLA-DQB1*06:09  | 0 | 1  | 1.000 | .990  | .971 | 1.010 |
| HLA-DRB1*01:01  | 0 | 7  | 1.000 | .930  | .881 | .981  |

|                |   |    |       |       |      |       |
|----------------|---|----|-------|-------|------|-------|
| HLA-DRB1*03:01 | 0 | 13 | .354  | .870  | .807 | .938  |
| HLA-DRB1*03:02 | 0 | 1  | 1.000 | .990  | .971 | 1.010 |
| HLA-DRB1*04:01 | 1 | 3  | .369  | .360  | .041 | 3.193 |
| HLA-DRB1*04:04 | 1 | 0  | .107  | 1.091 | .920 | 1.294 |
| HLA-DRB1*04:05 | 0 | 1  | 1.000 | .990  | .971 | 1.010 |
| HLA-DRB1*07:01 | 0 | 13 | .354  | .870  | .807 | .938  |
| HLA-DRB1*08:01 | 1 | 2  | .291  | .240  | .023 | 2.453 |
| HLA-DRB1*10:01 | 0 | 2  | 1.000 | .980  | .953 | 1.008 |
| HLA-DRB1*11:01 | 2 | 2  | .056  | .120  | .019 | .776  |
| HLA-DRB1*11:02 | 0 | 2  | 1.000 | .980  | .953 | 1.008 |
| HLA-DRB1*11:03 | 1 | 1  | .204  | .120  | .008 | 1.797 |
| HLA-DRB1*11:04 | 2 | 11 | .629  | .660  | .166 | 2.630 |
| HLA-DRB1*12:01 | 0 | 2  | 1.000 | .980  | .953 | 1.008 |
| HLA-DRB1*13:01 | 2 | 5  | .163  | .300  | .065 | 1.381 |
| HLA-DRB1*13:02 | 0 | 6  | 1.000 | .940  | .895 | .988  |
| HLA-DRB1*13:03 | 0 | 3  | 1.000 | .970  | .937 | 1.004 |
| HLA-DRB1*13:05 | 0 | 1  | 1.000 | .990  | .971 | 1.010 |
| HLA-DRB1*14:01 | 0 | 1  | 1.000 | .990  | .971 | 1.010 |
| HLA-DRB1*14:04 | 0 | 1  | 1.000 | .990  | .971 | 1.010 |
| HLA-DRB1*14:54 | 0 | 4  | 1.000 | .960  | .922 | .999  |
| HLA-DRB1*15:01 | 1 | 7  | 1.000 | .840  | .113 | 6.256 |
| HLA-DRB1*15:02 | 0 | 3  | 1.000 | .970  | .937 | 1.004 |
| HLA-DRB1*16:01 | 1 | 7  | 1.000 | .840  | .113 | 6.256 |
| HLA-DRB1*16:02 | 0 | 1  | 1.000 | .990  | .971 | 1.010 |

\* Statistical significance was determined after calculating the *p*-value, OR (odds ratio), and CI (confidence interval). The chi-square test or Fisher's test was used to estimate the differences between the patient and control groups; *n*: number of alleles in the patient and control groups.
